# Supplementary material for: From alloy composition to battery performance: a machine learning strategy for the design of Mg–air battery anodes
Source: Royal Society of Chemistry journal article supplement (doi:10.1039/d5ta07128c), 2025-01-01
Supplement: d5ta07128c1.pdf [file d5ta07128c1.pdf]

## Supporting information

### *Data collection*

A dataset has been constructed to predict the specific energy of Mg-air batteries, utilizing sample data derived from experimental studies published in relevant literature since 2010. These publications are sourced from reputable academic journals in the fields of materials science and electrochemistry. The majority of these resources are accessible via subscription-based platforms, such as Elsevier, American Chemical Society, Springer, and Royal Society of Chemistry, offering a wide array of high-quality research articles. The data collection focuses on capturing information on alloy composition, heat treatment processes (e.g., homogenization, hot extrusion, hot rolling), cathode materials and battery performance. This effort results in the compilation of 1,235 data points on Mg-air batteries.

Subsequently, data cleansing is performed. Initially, 103 entries with missing values are eliminated. In addition, while the diversity of alloy types and the intricate composition of alloying elements contribute to an expanded information space for sample analysis, this complexity also complicates the optimization of alloy compositions and the overall improvement of their properties. To simplify the dataset, an additional 92 samples of complex five-element and six-element alloys are excluded.

### *Addressing bias and noise in the dataset*

Variability inherent to diverse data sources and experimental parameters poses challenges, potentially introducing biases and noise that can compromise predictive model

23 performance. To systematically address these issues, the following strategies were rigorously  
24 implemented:

25 *Rigorous data source selection:* A stringent data source selection protocol was  
26 implemented, exclusively incorporating data points derived from peer-reviewed experimental  
27 studies published post-2010 in high-impact academic journals. This criterion established a  
28 fundamental level of data reliability and adherence to established methodological standards.  
29 Further prioritization was accorded to studies characterized by comprehensive experimental  
30 descriptions, complete datasets, and a demonstrably higher citation frequency, indicative of  
31 their broad influence within the scientific community.

32 *Feature engineering of key experimental conditions:* Key experimental parameters, such  
33 as alloy composition, heat treatment protocols, and cathode material classifications, were  
34 systematically extracted and engineered into distinctive features for the machine learning  
35 (ML) model. This approach enabled the model to explicitly learn the influence of these  
36 variables on battery performance, thereby effectively accounting for and reducing inherent  
37 biases stemming from varied experimental methodologies.

38 *Data standardization:* To minimize inter-study variability and mitigate inherent biases,  
39 experimental conditions and reported parameters were rigorously standardized. This involved  
40 normalization based on widely accepted metrics, including metal composition ratios, current  
41 density processing methods, and categorical classifications of cathode catalysts, ensuring  
42 comparability across disparate datasets.

43 *Cross-validation:* K-fold cross-validation was systematically employed to rigorously  
44 assess the generalization capability and robustness of the ML model, concurrently identifying

45 potential latent biases or noise within the dataset. This involved systematically partitioning  
46 the dataset into distinct training and validation subsets, facilitating iterative model evaluation  
47 across diverse data permutations.

48

#### 49 *Addressing duplicate or conflicting data*

50 In instances where disparate performance data were reported for ostensibly identical  
51 materials within the literature, the primary principle guiding our approach was to  
52 meticulously investigate whether these discrepancies originated from variations in  
53 experimental conditions (e.g., distinct testing temperatures, current densities, electrolyte  
54 compositions, or specific processing protocols). Following careful review, if data for the  
55 same material under purportedly identical experimental conditions nevertheless exhibited  
56 variations, these discrepancies were generally indicative of potential measurement errors,  
57 batch-to-batch variations in sample preparation, or reporting inconsistencies within the  
58 literature. In such scenarios, the subsequent hierarchical approaches were employed:

59 *Prioritization:* Prioritization was accorded to data sourced from higher-impact,  
60 authoritative journals, or datasets demonstrably widely cited by subsequent research,  
61 reflecting their greater reliability and scientific consensus.

62 *Statistical averaging/median:* Where multiple reliable but marginally divergent data  
63 points existed, their average or median value was considered for inclusion. The median, in  
64 particular, was favored for its enhanced robustness against potential outliers.

65 *Conservative estimation:* In specific scenarios, to bolster model robustness and prevent  
66 overly optimistic predictions, a more conservative estimate was adopted. For instance, if the

67 optimization objective was specific energy, a lower reported value might be selected.

68       *Outlier analysis:* Data points exhibiting significant deviations were subjected to rigorous  
69 outlier analysis. This process, critically informed by domain-specific expertise, guided  
70 decisions regarding their correction, removal, or further meticulous scrutiny.

71

## 72 ***Addressing data heterogeneity challenges***

73       The collection of training data from heterogeneous literature sources inherently poses  
74 challenges to data uniformity, due to potential variations in experimental details across  
75 research groups and the limited ability of selected features to fully capture such variance. To  
76 meticulously address these issues and ensure robust model training, a multi-layered strategy  
77 was employed.

78       Initially, data acquisition prioritized high-impact and authoritative journals, or those  
79 extensively cited in subsequent literature. This established a foundation of reliability and  
80 helped mitigate inconsistencies arising from less rigorously reported studies. Furthermore,  
81 once it was confirmed that observed data discrepancies were not attributable to identifiable  
82 variations in experimental conditions (e.g., measurement error, batch-to-batch variability, or  
83 reporting inconsistencies), a nuanced approach to data treatment was adopted.

84       In instances of slight numerical discrepancies among multiple reliable data points, the  
85 median was preferred over the mean owing to its greater robustness against potential outliers,  
86 which might stem from subtle, unaccounted-for experimental differences. For energy density,  
87 conservative estimates were additionally employed to mitigate the risk of overly optimistic  
88 model predictions in the presence of inherent data scatter.

89 Concurrently, a rigorous outlier analysis was conducted on data points exhibiting  
90 significant deviations. Guided by domain expertise, decisions were made regarding their  
91 correction, removal, or further investigation, thereby directly addressing potential anomalies  
92 stemming from diverse experimental protocols. Ultimately, to further optimize the dataset,  
93 minimize intrinsic noise, and enhance the model's generalizability to core material systems, a  
94 select number of complex multi-element alloy samples—often associated with higher  
95 inherent variability and more challenging experimental standardization—were systematically  
96 excluded.

#### 98 *Detailed data cleaning process*

99 The data cleaning process comprised the following sequential steps:

100 *Missing value handling:* Upon initial compilation, a systematic assessment for missing  
101 values was performed. A total of 103 entries were identified as lacking target values. To  
102 uphold data quality and facilitate effective model training, these entries were systematically  
103 excluded from the dataset.

104 *Exclusion of complex alloy samples:* To streamline the dataset representation and enable  
105 the ML model to more accurately capture the performance patterns of fundamental alloy  
106 systems, highly complex five-element and six-element alloy samples were systematically  
107 excluded. This accounted for 92 multi-element entries. Their removal was justified by their  
108 inherent compositional complexity, which typically leads to performance characteristics  
109 significantly divergent from more prevalent binary, ternary, or quaternary alloys.  
110 Furthermore, as they constituted a minor fraction of the overall dataset, their exclusion aimed

111 to optimize the model's generalization capability and enhance interpretability.

112       *Data Standardization:* Throughout the entire data cleaning process, meticulous attention  
113 was paid to ensuring the consistency of all numerical data units and standardizing data  
114 formats, thereby optimizing the dataset for subsequent ML model processing.

115

#### 116 ***Exclusion of higher-order Mg alloys***

117       This work intentionally excluded higher-order Mg alloys (quinary and above) from the  
118 initial dataset primarily due to insufficient statistical representativeness. The scarcity of data  
119 points for these systems would introduce noise, risk overfitting, and degrade the robustness  
120 and generalization ability of ML models. Moreover, higher-order alloys often exhibit distinct  
121 strengthening mechanisms and microstructural evolutions (e.g., high-entropy effects)  
122 compared to lower-order systems. Mixing fundamentally different metallurgical systems  
123 without adequate data could lead to misleading correlations and hinder accurate model  
124 training.

125       This study focuses on establishing a robust, interpretable ML methodology for screening  
126 new Mg anode materials using simpler alloy systems (binary, ternary, quaternary). This  
127 strategic exclusion ensures foundational reliability, allowing to rigorously validate the  
128 approach and lay a solid basis for future methodological extensions to more complex  
129 compositional spaces.

130       While higher-order Mg alloys represent a promising frontier, their data scarcity is a  
131 current challenge. We propose an iterative methodology: combining high-throughput  
132 theoretical screening (e.g., DFT, CALPHAD) to generate virtual datasets, followed by

133 targeted experimental verification. This experimental feedback will continuously calibrate  
134 and optimize the model, forming a closed-loop of prediction and refinement. Future work  
135 will integrate deep learning and multi-scale data fusion to accelerate the discovery and  
136 application of these advanced alloys.

137

### 138 *Feature preparation*

139 The alloy composition and experimental testing conditions are recognized as critical  
140 parameters influencing the specific energy of Mg-air batteries. Features that describe the  
141 electronic and physical properties of Mg alloys are utilized, enabling a more comprehensive  
142 understanding of their characteristics. Importantly, these features can be quantified without  
143 the need for intricate and time-consuming quantum chemical calculations, thereby ensuring  
144 more accessible and practical. The types of features employed in this study are detailed in  
145 **Tables S1 and S2**. As shown in **Table S1**, the electronic and physical properties of these  
146 alloys are categorized into 36 distinct classes, with each class yielding 3 distinct features  
147 derived from Formulas (1)-(3), where  $a_i$  represents the molar ratios of the  $i$ th constituent  
148 elements of Mg alloys,  $x_i$  represents the property of the  $i$ th element,  $\bar{x}$  denotes the mean value  
149 of property,  $\delta_x$  signifies the difference of property between the specific element in alloys and  
150 mean value of alloys,  $x_{Mg}$  represents the property of pure Mg, and  $\delta_{x.Mg}$  indicates the  
151 difference of property between the specific element in alloys and Mg element.

152 For category  $i$ , Formula (1) computes the average electronic or physical properties ( $\bar{x}$ )  
153 by summing values of  $i$  property ( $x_i$ ) according to the molar ratios ( $a_i$ ) of the constituent  
154 elements in Mg alloys, resulting in feature " $i.m$ ". For instance,  $E_{ea}$  represents electron

155 affinity; thus, the average electron affinity of the alloy is calculated using Formula (1) and is  
 156 designated as feature "*Eea.m*". Similarly, Formula (2) is employed to evaluate the variations  
 157 in electronic and physical properties among the elements in magnesium alloys, referred to as  
 158 feature "*i*". Furthermore, Formula (3) assesses the performance quality differences between  
 159 the doped elements and magnesium within the alloys, designated as feature "*i.Mg*".

$$\text{Feature } i.m : \quad \bar{x} = \sum a_i x_i \quad (1)$$

$$\text{Feature } i : \quad \delta_x = \sqrt{\sum a_i \left( I - \frac{x_i}{x} \right)^2} \quad (2)$$

$$\text{Feature } i.Mg : \quad \delta_{x.Mg} = \sqrt{\sum a_i \left( I - \frac{x_i}{x_{Mg}} \right)^2} \quad (3)$$

160

161 Note that *Eea* is calculated exclusively using Formula 1 and Formula 2, whereas *Smis*,  
 162 mixing entropy, is calculated solely with Formula 1. As a result, 105 features are generated to  
 163 describe the electronic and physical properties of alloys. The mole fraction of 27 elements  
 164 (listed in **Table S2**) is taken into account as features. Furthermore, features representing six  
 165 different thermal treatment processes were incorporated, which significantly influences the  
 166 microstructure and macroscopic properties of the alloys. The type of cathode catalyst is also  
 167 included, given its pivotal role in the oxygen reduction reaction within the battery. For these  
 168 parameters, one-hot encoding was applied to properly represent their distinct nominal  
 169 categories. The current density and discharge time, critical experimental parameters, are  
 170 included as well, as they are closely related to the power output and energy density of the  
 171 battery. In summary, we have assembled a comprehensive set of 144 features. These features  
 172 provide ML model with a holistic perspective to understand and predict the performance of



173 different alloys when they are used as anodes in Mg-air batteries.

174 **Table S1** The list of physical features for predicting specific energy.

| <b>Physical properties<sup>a)</sup></b> |                                                                      |             |                                                                 |
|-----------------------------------------|----------------------------------------------------------------------|-------------|-----------------------------------------------------------------|
| <b>Abb.</b>                             | <b>Description</b>                                                   | <b>Abb.</b> | <b>Description</b>                                              |
| XP                                      | Pauling electronegativities                                          | D           | Averaged density                                                |
| I1                                      | First ionization energies                                            | DI          | Averaged density in liquid                                      |
| I2                                      | Second ionization energies                                           | Tm          | Averaged melting temperature calculated by the rule of mixtures |
| I3                                      | Third ionization energies                                            | K           | Averaged thermal conductivity                                   |
| AW                                      | Atomic weight                                                        | R           | Averaged resistivity                                            |
| VEC                                     | Valence electrons                                                    | C           | Averaged electrical conductivity                                |
| A1                                      | Resulting first lattice constant calculated by the rule of mixtures  | Hf          | Heat of fusion                                                  |
| A2                                      | Resulting second lattice constant calculated by the rule of mixtures | Cs          | Specific heat capacity                                          |
| A3                                      | Resulting third lattice constant calculated by the rule of mixtures  | Cm          | Molar heat capacity                                             |
| Rm                                      | Atomic radii                                                         | Smis        | Mixing entropy                                                  |
| Rc                                      | Covalent radii                                                       | H1          | Mohs hardness                                                   |
| Eea                                     | Electron affinity                                                    | H2          | Brinell hardness                                                |
| MV                                      | Molar Volume                                                         | M1          | Bulk modulus                                                    |
| AN                                      | Atomic number                                                        | M2          | Shear modulus                                                   |
| SEN                                     | The number of electrons in the second outermost shell                | M3          | Young modulus                                                   |
| PR                                      | Poisson ratio                                                        | MS3         | Volume magnetic susceptibility                                  |
| MS1                                     | Mass magnetic susceptibility                                         | S           | Standard entropy                                                |
| MS2                                     | Molar magnetic susceptibility                                        | H           | Standard enthalpy                                               |

175 <sup>a)</sup>The element parameters come from <http://www.periodictable.com>.

176 **Table S2** The list of experimental features for predicting specific energy.

| <b>Experimental parameters</b> |                          | <b>Experimental parameters</b> |                          |
|--------------------------------|--------------------------|--------------------------------|--------------------------|
| <b>Abb.</b>                    | <b>Description</b>       | <b>Abb.</b>                    | <b>Description</b>       |
| Mg/%                           | The molar fraction of Mg | Ag/%                           | The molar fraction of Ag |
| Al/%                           | The molar fraction of Al | Er/%                           | The molar fraction of Er |
| Zn/%                           | The molar fraction of Zn | Ge/%                           | The molar fraction of Ge |
| Y/%                            | The molar fraction of Y  | Cd/%                           | The molar fraction of Cd |
| Zr/%                           | The molar fraction of Zr | Cu/%                           | The molar fraction of Cu |
| Sm/%                           | The molar fraction of Sm | Pr/%                           | The molar fraction of Pr |
| Mn/%                           | The molar fraction of Mn | Th/%                           | The molar fraction of Th |
| Gd/%                           | The molar fraction of Gd | P1                             | Homogenization           |
| Ca/%                           | The molar fraction of Ca | P2                             | Hot extrusion            |

|      |                          |        |                                  |
|------|--------------------------|--------|----------------------------------|
| In/% | The molar fraction of In | P3     | Hot rolling                      |
| Bi/% | The molar fraction of Bi | P4     | Quenching                        |
| Li/% | The molar fraction of Li | P5     | As-cast                          |
| Sn/% | The molar fraction of Sn | P6     | Solution                         |
| Ce/% | The molar fraction of Ce | MA     | Current density                  |
| Ga/% | The molar fraction of Ga | Num    | The number of elements in alloys |
| Si/% | The molar fraction of Si | CT     | Discharge time                   |
| Ba/% | The molar fraction of Ba | Cat.Pt | Pt electrode                     |
| Nd/% | The molar fraction of Nd | Cat.Mn | MnO <sub>2</sub>                 |
| Pb/% | The molar fraction of Pb | Cat.Ag | Ag electrode                     |
| La/% | The molar fraction of La |        |                                  |

177

## 178 *SHAP analysis*

179 Shapley Additive Explanations (SHAP) is a model interpretation method based on

180 Shapley values from game theory. A key feature of the SHAP model is its additivity, which

181 means that the model output can be expressed as the sum of each feature contributions.

182 Formally, given an input  $x$ , SHAP model can be represented as follows:  $f(x) = \Phi_0 + \sum_{i=1}^M \Phi_i$

183 (4), where  $f(x)$  is the model output,  $\Phi_0$  denotes the baseline value (e.g., the average

184 prediction of the model) and  $\Phi_i$  represents the SHAP value for the  $i$ th feature.

185 **Table S3** The prediction accuracy of XGB models after screening features by RFE-Lasso.

| Features           | R <sup>2</sup> |             |             | MAE       |            |            |
|--------------------|----------------|-------------|-------------|-----------|------------|------------|
|                    | Train          | Val         | Test        | Train     | Val        | Test       |
| 144 features       | 0.96           | 0.81        | 0.51        | 48        | 141        | 146        |
| 100 features       | 0.97           | 0.71        | 0.56        | 41        | 155        | 144        |
| 90 features        | 0.97           | 0.77        | 0.76        | 36        | 149        | 114        |
| 80 features        | 0.97           | 0.79        | 0.42        | 39        | 146        | 183        |
| 70 features        | 0.97           | 0.78        | 0.61        | 39        | 146        | 142        |
| 60 features        | 0.98           | 0.79        | 0.81        | 35        | 137        | 93         |
| <b>50 features</b> | <b>0.98</b>    | <b>0.79</b> | <b>0.82</b> | <b>20</b> | <b>134</b> | <b>106</b> |
| 40 features        | 0.97           | 0.75        | 0.79        | 43        | 157        | 120        |
| 39 features        | 0.97           | 0.78        | 0.68        | 36        | 120        | 146        |
| 38 features        | 0.97           | 0.81        | 0.63        | 27        | 130        | 131        |
| <b>37 features</b> | <b>0.97</b>    | <b>0.81</b> | <b>0.78</b> | <b>22</b> | <b>120</b> | <b>119</b> |
| 36 features        | 0.97           | 0.75        | 0.76        | 21        | 154        | 117        |

|             |      |      |      |    |     |     |
|-------------|------|------|------|----|-----|-----|
| 35 features | 0.97 | 0.74 | 0.72 | 26 | 158 | 131 |
|-------------|------|------|------|----|-----|-----|

186

187 **Table S4** The parameter settings of models after screening features by RFE-Lasso.

| Feature number | Data partitioning                 | RFE-Lasso                                                                    | XGB                                                |
|----------------|-----------------------------------|------------------------------------------------------------------------------|----------------------------------------------------|
| 144 features   | test_size=0.15,<br>random_state=3 |                                                                              | random_state=0,<br>n_estimators=31,<br>max_depth=7 |
| 100 features   | test_size=0.15,<br>random_state=1 | Lasso(alpha=1),<br>RFE(estimator=lasso,<br>n_features_to_select=100, step=1) | random_state=0,<br>n_estimators=31,<br>max_depth=8 |
| 90 features    | test_size=0.15,<br>random_state=5 | Lasso(alpha=1),<br>RFE(estimator=lasso,<br>n_features_to_select=90, step=1)  | random_state=0,<br>n_estimators=31,<br>max_depth=8 |
| 80 features    | test_size=0.15,<br>random_state=5 | Lasso(alpha=1),<br>RFE(estimator=lasso,<br>n_features_to_select=80, step=1)  | random_state=0,<br>n_estimators=31,<br>max_depth=8 |
| 70 features    | test_size=0.15,<br>random_state=5 | Lasso(alpha=1),<br>RFE(estimator=lasso,<br>n_features_to_select=70, step=1)  | random_state=0,<br>n_estimators=31,<br>max_depth=8 |
| 60 features    | test_size=0.15,<br>random_state=5 | Lasso(alpha=1),<br>RFE(estimator=lasso,<br>n_features_to_select=60, step=1)  | random_state=0,<br>n_estimators=31,<br>max_depth=8 |
| 50 features    | test_size=0.15,<br>random_state=5 | Lasso(alpha=1),<br>RFE(estimator=lasso,<br>n_features_to_select=50, step=1)  | random_state=0,<br>n_estimators=71,<br>max_depth=8 |
| 40 features    | test_size=0.15,<br>random_state=5 | Lasso(alpha=1),<br>RFE(estimator=lasso,<br>n_features_to_select=40, step=1)  | random_state=0,<br>n_estimators=31,<br>max_depth=8 |
| 39 features    | test_size=0.15,<br>random_state=0 | Lasso(alpha=1),<br>RFE(estimator=lasso,<br>n_features_to_select=39, step=1)  | random_state=0,<br>n_estimators=31,<br>max_depth=8 |
| 38 features    | test_size=0.15,<br>random_state=2 | Lasso(alpha=1),<br>RFE(estimator=lasso,<br>n_features_to_select=38, step=1)  | random_state=0,<br>n_estimators=61,<br>max_depth=8 |
| 37 features    | test_size=0.15,<br>random_state=0 | Lasso(alpha=1),<br>RFE(estimator=lasso,<br>n_features_to_select=37, step=1)  | random_state=0,<br>n_estimators=61,<br>max_depth=9 |
| 36 features    | test_size=0.15,<br>random_state=5 | Lasso(alpha=1),<br>RFE(estimator=lasso,<br>n_features_to_select=36, step=1)  | random_state=0,<br>n_estimators=91,<br>max_depth=8 |
| 35 features    | test_size=0.15,<br>random_state=5 | Lasso(alpha=1),<br>RFE(estimator=lasso,                                      | random_state=0,<br>n_estimators=61,                |

188

189 **Table S5** The detailed meanings of the 37 features selected by RFE-Lasso.

| Order | Feature name | Definition                                                     | Feature importance |
|-------|--------------|----------------------------------------------------------------|--------------------|
| 1     | Al/%         | The molar fraction of Al                                       | 13.3               |
| 2     | Zn/%         | The molar fraction of Zn                                       | 7.0                |
| 3     | Y/%          | The molar fraction of Y                                        | 0.8                |
| 4     | Zr/%         | The molar fraction of Zr                                       | 0.1                |
| 5     | Sm/%         | The molar fraction of Sm                                       | 1.2                |
| 6     | Mn/%         | The molar fraction of Mn                                       | 2.6                |
| 7     | Gd/%         | The molar fraction of Gd                                       | 0.3                |
| 8     | Ca/%         | The molar fraction of Ca                                       | 7.4                |
| 9     | In/%         | The molar fraction of In                                       | 1.0                |
| 10    | Ce/%         | The molar fraction of Ce                                       | 1.2                |
| 11    | Ba/%         | The molar fraction of Ba                                       | 0.1                |
| 12    | Pb/%         | The molar fraction of Pb                                       | 0.0                |
| 13    | Er/%         | The molar fraction of Er                                       | 0.4                |
| 14    | Cd/%         | The molar fraction of Cd                                       | 0.2                |
| 15    | VEC          | Valence electron deviation                                     | 21.3               |
| 16    | D            | Averaged density deviation                                     | 30.0               |
| 17    | A2           | Second lattice constant deviation                              | 7.4                |
| 18    | Cm           | Molar heat capacity deviation                                  | 11.0               |
| 19    | Eea          | Electron affinity deviation                                    | 76.4               |
| 20    | H1.m         | Averaged mohs hardness                                         | 20.3               |
| 21    | H2           | Brinell hardness deviation                                     | 28.4               |
| 22    | M2.Mg        | Difference in shear modulus of alloy with pure Mg              | 25.7               |
| 23    | PR           | Poisson ratio deviation                                        | 10.8               |
| 24    | MS1          | Mass magnetic susceptibility deviation                         | 9.8                |
| 25    | MS2          | Molar magnetic susceptibility deviation                        | 13.1               |
| 26    | SEN.m        | The averaged number of electrons in the second outermost shell | 16.0               |
| 27    | S.Mg         | Standard entropy deviation                                     | 8.6                |
| 28    | P1           | Homogenization                                                 | 4.1                |
| 29    | P2           | Hot extrusion                                                  | 1.6                |
| 30    | P3           | Hot rolling                                                    | 3.0                |
| 31    | P4           | Quenching                                                      | 5.9                |
| 32    | P5           | As-cast                                                        | 38.3               |
| 33    | MA           | Current density                                                | 116.3              |
| 34    | Cat.Pt       | Pt electrode                                                   | 5.1                |
| 35    | Cat.Mn       | MnO <sub>2</sub>                                               | 8.1                |
| 36    | Cat.Ag       | Ag electrode                                                   | 0.0                |

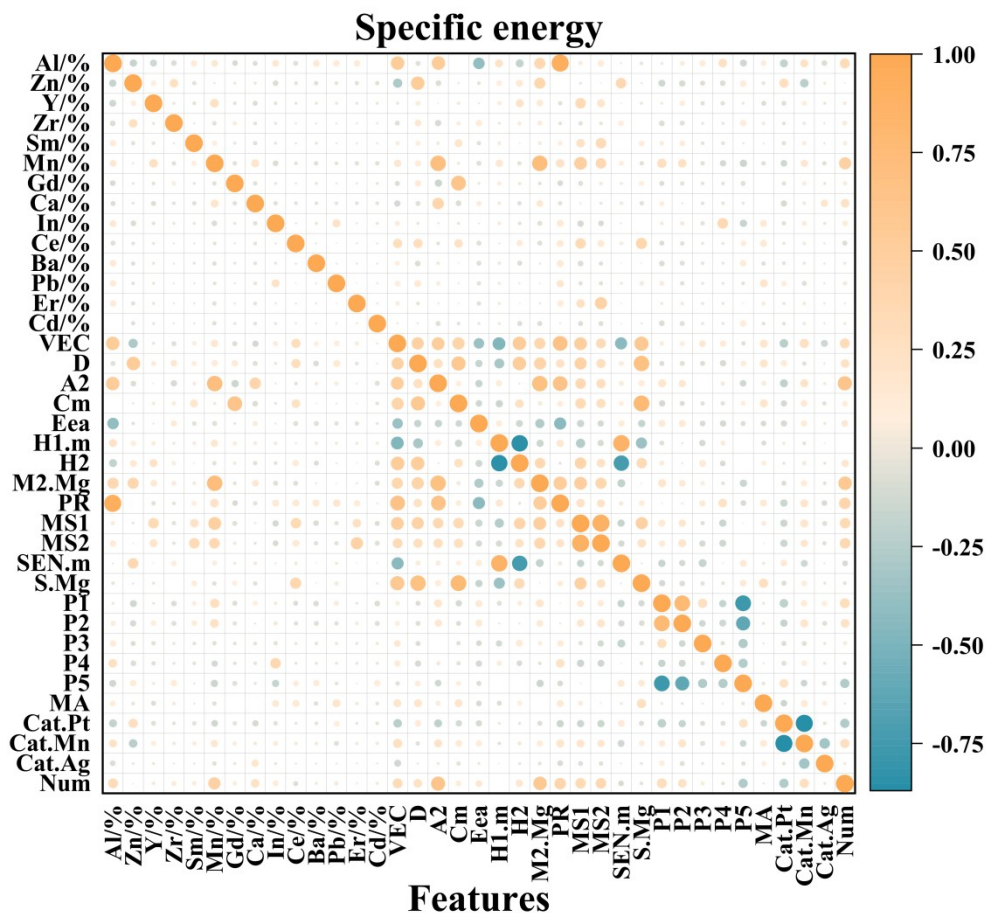

**Fig. S1.** The heatmap of correlation coefficients ( $C_{i,j}$ ) between every two features calculated via the Pearson method.

### Performance comparison of models

To rigorously validate the effectiveness of the RFE-Lasso method in feature selection, its performance was comparatively assessed against RFE-XGB and Lasso, with the number of retained features consistently fixed at 37. As depicted in **Fig. S2a**, RFE-Lasso exhibited markedly superior feature selection capabilities, achieving a **Test** dataset  $R^2$  of 0.78. This performance significantly surpassed RFE-XGB ( $R^2 = 0.51$ ) and Lasso ( $R^2 = 0.63$ ), primarily due to its synergistic integration of the advantages inherent to both RFE and Lasso. Notably,

202 this method proved particularly efficacious for predicting Mg alloys containing elements not  
 203 present in the original training dataset.

204 Subsequently, a comparative analysis was undertaken to evaluate the applicability and  
 205 predictive performance of five prevalent ML algorithms—XGBoost (XGB), Random Forest  
 206 (RF), Gradient Boosting Regression (GBR), Support Vector Machine (SVM), and Multilayer  
 207 Perceptron (MLP)—on the Mg-air battery dataset. The parameter settings of these models are  
 208 presented in **Tables S6**. As illustrated in **Fig. S2b**, XGBoost consistently emerged as the  
 209 highest-performing algorithm, yielding the most robust  $R^2$  values on the **Val** set (0.81), the  
 210 **Test** set (0.78), and across 10-fold cross-validation (average  $R^2 = 0.76$ ). In stark contrast,  
 211 while RF performed reasonably well on the **Val** set and during cross-validation, its **Test**  
 212 dataset  $R^2$  declined significantly to 0.58, indicating a suboptimal capacity for generalization  
 213 beyond the training data. Furthermore, GBR, SVM, and MLP consistently demonstrated  
 214 lower predictive performance across both the initial and **Test** datasets. These findings  
 215 unequivocally establish XGB as the most reliable and effective model for predicting battery  
 216 properties within this study, offering superior robustness and generalization capabilities  
 217 compared to the other evaluated algorithms.

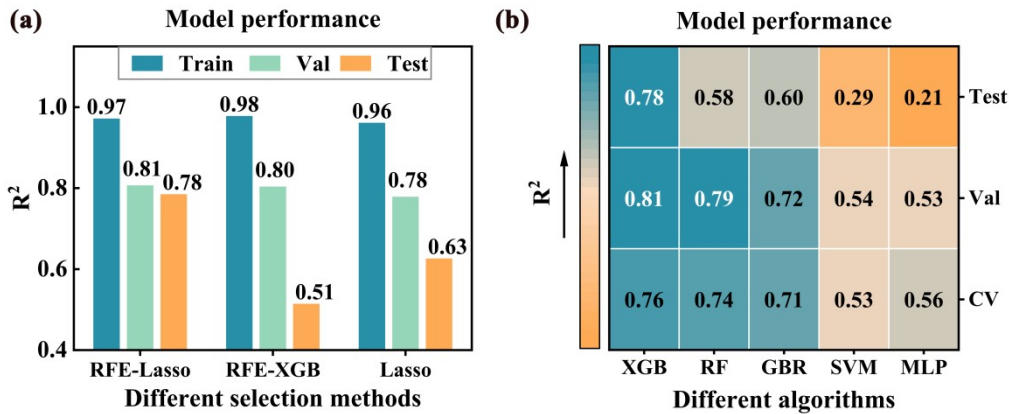

218  
 219 **Fig. S2** Performance comparison of models: (a) models employing three distinct feature

220 selection methods; (b) models utilizing different algorithms.

221 **Table S6** The parameter settings for different algorithms.

| Algorithms | Parameters                                                                                                         |
|------------|--------------------------------------------------------------------------------------------------------------------|
| XGB        | random_state = 0, n_estimators = 61, max_depth = 9                                                                 |
| RF         | n_estimators = 31, max_depth = 19, bootstrap = True, random_state = 47                                             |
| GBR        | learning_rate = 0.28, random_state = 47, n_estimators = 60                                                         |
| SVM        | Kernel = 'rbf', C = 1300.0, epsilon = 1e-05, gamma = 0.02                                                          |
| MLP        | max_iter=80, hidden_layer_sizes = [64, 64], alpha = 0.58, activation = 'relu', solver = 'lbfgs', random_state = 30 |

222

223 ***Detailed calculation of "main SHAP values"***

224 To precisely quantify the individual contribution of each feature to the model's  
 225 prediction, "Main SHAP values" were derived using the SHAP interaction module. This  
 226 approach is efficient for distinguishing the independent impact of a feature from its  
 227 synergistic or antagonistic interactions with other features, thereby enhancing the  
 228 interpretability of ML model.

229 The SHAP interaction module specifically computes a square interaction matrix for each  
 230 datapoint, where off-diagonal elements ( $SHAP_{ij}$ ) represent the interaction effect between  
 231 feature  $i$  and feature  $j$ . A positive  $SHAP_{ij}$  indicates a synergistic effect, implying that the joint  
 232 presence of features  $i$  and  $j$  enhances the target prediction. Conversely, a negative value  
 233 signifies an antagonistic effect, where their combined influence diminishes the target  
 234 prediction.

235 The "Main SHAP values" are specifically defined by the diagonal elements of this  
 236 matrix,  $SHAP_{i,i}$ . These self-interaction terms quantify the isolated, individual contribution of  
 237 feature  $i$  to the model's output. By design,  $SHAP_{i,i}$  reflects the unique marginal impact of  
 238 feature  $i$ , effectively filtering out the influence of other variables. Consequently, it represents  
 239 the pure, independent contribution of that single feature.

Therefore, for each sample in the dataset and for all 37 features, the SHAP interaction module was utilized to compute these interaction matrices. The "Main SHAP value" for any given feature was then directly extracted from the corresponding diagonal element ( $SHAP_{i,i}$ ) of the corresponding matrix. This methodology provides a direct and explicit measure of each feature's independent predictive power across all samples, which is crucial for robust scientific interpretation.

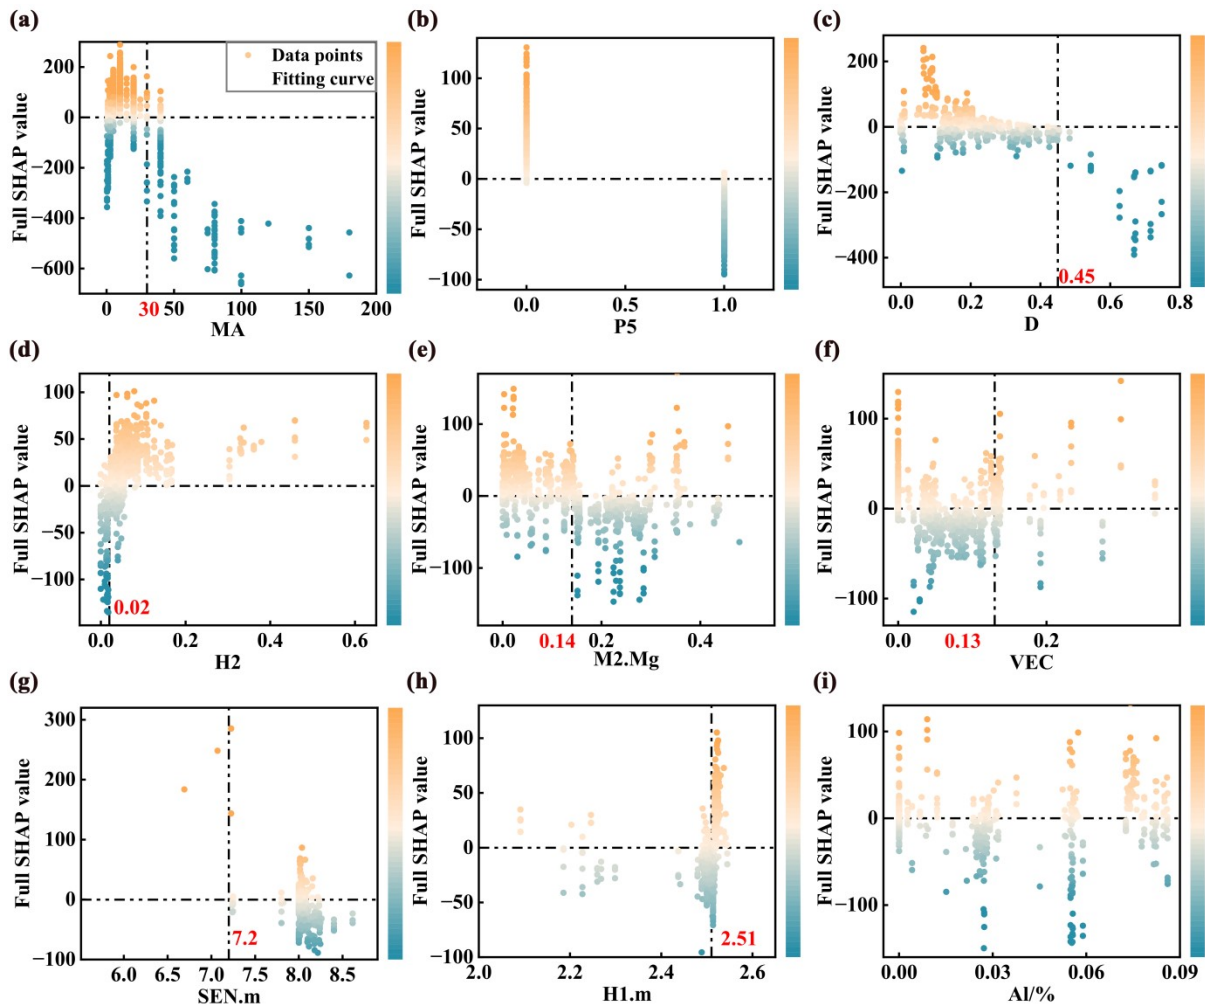

**Fig. S3.** The scatter plot of full SHAP values before filtering out the interaction effects: (a) MA; (b) P5; (c) D; (d) H2; (e) M2.Mg; (f) VEC; (g) SEN.m; (h) H1.m; (i) Al/%.



251 **Table S7** The threshold value of screening conditions.

| Abb.                 | Descriptor          | Threshold value                                                                                     |
|----------------------|---------------------|-----------------------------------------------------------------------------------------------------|
| A                    | MA                  | $MA \leq 30$                                                                                        |
| B                    | Eea                 | $Eea \geq 13.5$                                                                                     |
| C                    | P5                  | $P5 = 0$                                                                                            |
| D                    | D                   | $D \leq 0.45$                                                                                       |
| E                    | H2                  | $H2 \geq 0.02$                                                                                      |
| F                    | M2.Mg               | $M2.Mg \leq 0.14$ or $M2.Mg \geq 0.30$                                                              |
| G                    | VEC                 | $VEC \leq 0.05$ or $VEC \geq 0.13$                                                                  |
| H                    | H1.m                | $H1.m \geq 2.51$                                                                                    |
| B + D                | Eea, D              | $Eea \geq 13.5, D \leq 0.45$                                                                        |
| <b>B + F</b>         | Eea, M2.Mg          | $Eea \geq 13.5, M2.Mg \leq 0.14$ or $M2.Mg \geq 0.30$                                               |
| B + G                | Eea, VEC            | $Eea \geq 13.5, VEC \leq 0.05$ or $VEC \geq 0.13$                                                   |
| <b>A + B + F</b>     | MA, Eea, M2.Mg      | $MA \leq 30, Eea \geq 13.5, M2.Mg \leq 0.14$ or $M2.Mg \geq 0.30$                                   |
| <b>A + B + G</b>     | MA, Eea, VEC        | $MA \leq 30, Eea \geq 13.5, VEC \leq 0.05$ or $VEC \geq 0.13$                                       |
| <b>B + F + G</b>     | Eea, M2.Mg, VEC     | $Eea \geq 13.5, M2.Mg \leq 0.14$ or $M2.Mg \geq 0.30, VEC \leq 0.05$ or $VEC \geq 0.13$             |
| <b>A + B + F + G</b> | MA, Eea, M2.Mg, VEC | $MA \leq 30, Eea \geq 13.5, M2.Mg \leq 0.14$ or $M2.Mg \geq 0.30, VEC \leq 0.05$ or $VEC \geq 0.13$ |
| <b>A + B + C + F</b> | MA, Eea, P5, M2.Mg  | $MA \leq 30, Eea \geq 13.5, P5 = 0, M2.Mg \leq 0.14$ or $M2.Mg \geq 0.30$                           |

252

253 **Table S8** The screening conditions validated using the initial dataset comprising 1,024  
254 samples for establishing the ML model.

| Abb. | Descriptor | True        |       |       | False       |       |       |
|------|------------|-------------|-------|-------|-------------|-------|-------|
|      |            | Data points | Good  | Bad   | Data points | Good  | Bad   |
| A    | MA         | 878         | 15.1% | 84.9% | 146         | 2.7%  | 97.3% |
| B    | Eea        | 283         | 24.7% | 75.3% | 741         | 9.0%  | 91.0% |
| C    | P5         | 480         | 17.1% | 82.9% | 544         | 10.1% | 89.9% |
| D    | D          | 981         | 13.6% | 86.4% | 43          | 9.3%  | 90.7% |
| E    | H2         | 819         | 14.3% | 85.7% | 205         | 9.8%  | 90.2% |
| F    | M2.Mg      | 634         | 18.5% | 81.5% | 390         | 5.1%  | 94.9% |

|                      |                     |            |              |              |            |             |              |
|----------------------|---------------------|------------|--------------|--------------|------------|-------------|--------------|
| G                    | VEC                 | 589        | 17.7%        | 82.3%        | 435        | 7.6%        | 92.4%        |
| H                    | H1.m                | 367        | 9.3%         | 90.7%        | 657        | 15.7%       | 84.3%        |
| B + D                | Eea, D              | 276        | 25.4%        | 74.6%        | 748        | 9.0%        | 91.0%        |
| <b>B + F</b>         | Eea, M2.Mg          | <b>223</b> | <b>30.9%</b> | <b>69.1%</b> | <b>801</b> | <b>8.5%</b> | <b>91.5%</b> |
| B + G                | Eea, VEC            | 230        | 29.1%        | 70.9%        | 794        | 8.8%        | 91.2%        |
| <b>A + B + F</b>     | MA, Eea, M2.Mg      | <b>196</b> | <b>35.2%</b> | <b>64.8%</b> | <b>828</b> | <b>8.2%</b> | <b>91.8%</b> |
| A + B + G            | MA, Eea, VEC        | 199        | 33.7%        | 66.3%        | 825        | 8.5%        | 91.5%        |
| B + F + G            | Eea, M2.Mg, VEC     | 196        | 33.7%        | 66.3%        | 828        | 8.6%        | 91.4%        |
| <b>A + B + F + G</b> | MA, Eea, M2.Mg, VEC | <b>174</b> | <b>37.9%</b> | <b>62.1%</b> | <b>850</b> | <b>8.4%</b> | <b>91.6%</b> |
| A + B + C + F        | MA, Eea, P5, M2.Mg  | 123        | 33.3%        | 66.7%        | 901        | 10.7%       | 89.3%        |

255

256 Features B (Eea) and F (M2.Mg) are top 2 effective screening conditions with larger  
257 "Good" yields in "Ture" samples (**Table S8**). Feature A (MA) emerges as the most effective  
258 to evaluate the "Bad" yield in "False" sample. Although these 8 screening conditions all  
259 exhibit high "Bad" yields in "False" sample, their "Good" yields in "Ture" samples are  
260 insufficient to reliably determine the potential anodes. Therefore, it is not reliable and  
261 inadequate to identify the high-quality anodes on the threshold value achieved from a single  
262 descriptor.

|              |      | Screening results |       |
|--------------|------|-------------------|-------|
|              |      | True              | False |
| Actual value | Good | TP                | FN    |
|              | Bad  | FP                | TN    |

263

264 **Fig. S4.** The confusion matrix of screening results.

$$Accuracy = \frac{TP + TN}{TP + TN + FP + FN} \quad (5)$$

$$Precision = \frac{TP}{TP + FP} \quad (6)$$

$$Recall = \frac{TP}{TP + FN} \quad (7)$$

$$F1 = \frac{2TP}{2TP + FN + FP} \quad (8)$$

265

266 **Table S9** The accuracy, presion, recall and F1-score of screening results in original dataset.

| Abb.           | Description                            | Accuracy     | Precision    | Recall       | F1-score     |
|----------------|----------------------------------------|--------------|--------------|--------------|--------------|
| A              | $MA \leq 30$                           | 26.9%        | 15.1%        | 97.1%        | 26.2%        |
| B              | $E_{ea} \geq 13.5$                     | 72.7%        | 24.7%        | 51.1%        | 33.3%        |
| C              | $P5 = 0$                               | 55.8%        | 17.1%        | 59.9%        | 26.6%        |
| D              | $D \leq 0.45$                          | 16.8%        | 13.6%        | 97.1%        | 23.8%        |
| E              | $H2 \geq 0.02$                         | 29.5%        | 14.3%        | 85.4%        | 24.5%        |
| F              | $M2.Mg \leq 0.14$ or $M2.Mg \geq 0.30$ | 47.6%        | 18.5%        | 85.4%        | 30.4%        |
| G              | $VEC \leq 0.05$ or $VEC \geq 0.13$     | 49.4%        | 17.7%        | 75.9%        | 28.7%        |
| H              | $H1.m \geq 2.51$                       | 57.4%        | 9.3%         | 24.8%        | 13.5%        |
| B+D            |                                        | 73.3%        | 25.4%        | 51.1%        | 33.9%        |
| <b>B+F</b>     |                                        | <b>78.3%</b> | <b>30.9%</b> | <b>50.4%</b> | <b>38.3%</b> |
| B+G            |                                        | 77.2%        | 29.1%        | 48.9%        | 36.5%        |
| <b>A+B+F</b>   |                                        | <b>81.0%</b> | <b>35.2%</b> | <b>50.4%</b> | <b>41.4%</b> |
| A+B+G          |                                        | 80.3%        | 33.7%        | 48.9%        | 39.9%        |
| B+F+G          |                                        | 80.4%        | 33.7%        | 48.2%        | 39.6%        |
| <b>A+B+F+G</b> |                                        | <b>82.5%</b> | <b>37.9%</b> | <b>48.2%</b> | <b>42.4%</b> |
| A+B+C+F        |                                        | 82.6%        | 33.3%        | 29.9%        | 31.5%        |

267

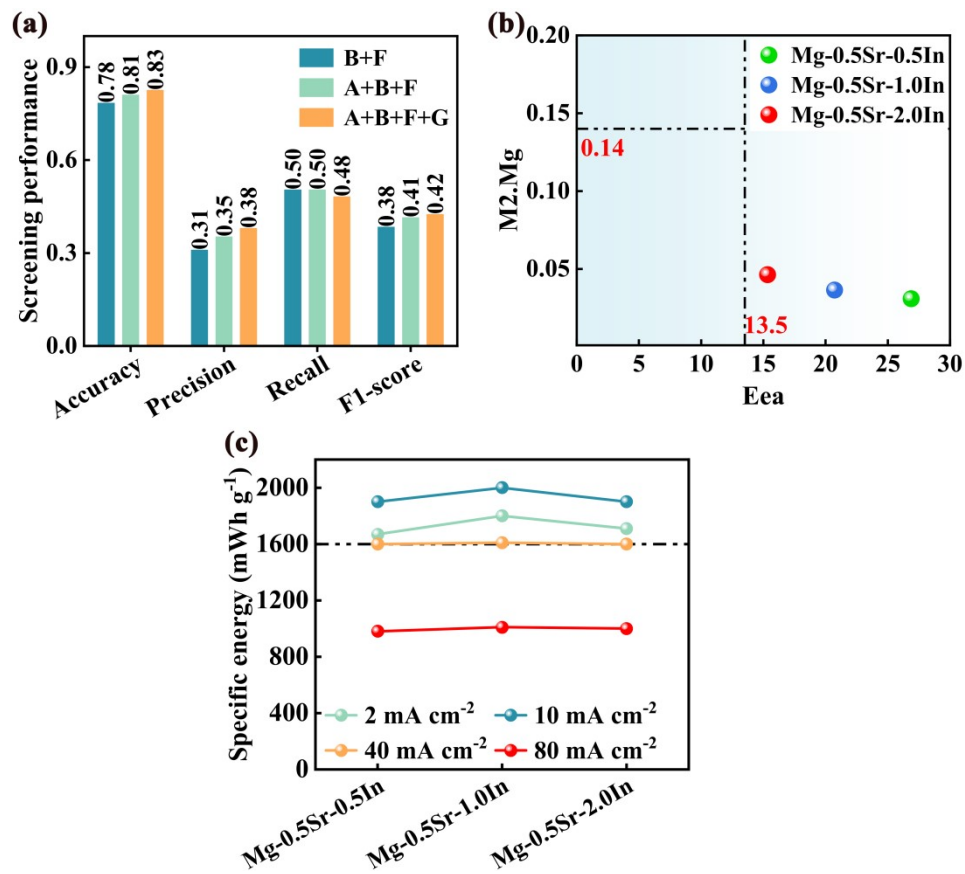

268

269 **Fig. S5.** Screening results and model predictions: (a) the accuracy, precision, recall and F1-  
270 score of screening results in original dataset; (b) E<sub>ea</sub> and M<sub>2</sub>Mg value of 12 data points  
271 derived from literature data; (c) actual specific energy of 12 samples derived from literature  
272 data.

273

#### 274 *Screening performance on ternary Mg-Sr-In alloys*

275 Additionally, the effectiveness of these screening criteria is systematically evaluated by  
276 four key metrics in machine learning classification: accuracy, precision, recall, and the F1-  
277 score. Detailed methodologies for calculating accuracy, precision, recall, and the F1-score,  
278 are provided in **Fig. S4**, Equations (5) - (8), and detailed values are given in **Table S9**. The  
279 definitions of the four metrics are as follows: TP (True Positive) denotes the number of  
280 positive samples correctly predicted as positive; TN (True Negative) denotes the number of  
281 negative samples correctly predicted as negative; FP (False Positive) denotes the number of  
282 negative samples incorrectly predicted as positive; FN (False Negative) denotes the number  
283 of positive samples incorrectly predicted as negative. Accuracy represents the proportion of  
284 samples that are correctly predicted out of the total sample set. Precision indicates the ratio of  
285 actual positives in the predicted positives. Recall denotes the proportion of actual positive  
286 samples that are correctly identified as positive. The F1-score is the harmonic mean of  
287 precision and recall, balancing both metrics.

288 As illustrated in **Fig. S5a**, the accuracy for each combination is approximately 0.80,  
289 demonstrating that precise screening can be accomplished with straightforward combinations  
290 of several descriptors. Considering both the screening performance and concise, the  
291 combination of B + F is selected as the screening condition. Furthermore, it has been verified

whether the B+F screening condition can be extended to Mg-Sr-In ternary alloys through literature data. The Mg-0.5Sr-0.5In, Mg-0.5Sr-1.0In, and Mg-0.5Sr-2.0In alloys derived from the literature meet the threshold values of the B+F condition (**Fig. S5b**), and thus they should exhibit excellent battery performance. Indeed, as reported in the literature, the aforementioned three alloys can achieve a specific energy of at least 1600 mWh g<sup>-1</sup> at current densities not exceeding 40 mA cm<sup>-2</sup> (**Fig. S5c**).

**Table S10** ICP results for the chemical composition of the investigated alloys (wt.%).

| Alloys   | Mg   | Sr   |
|----------|------|------|
| Mg-0.1Sr | Bal. | 0.09 |
| Mg-0.5Sr | Bal. | 0.42 |
| Mg-1Sr   | Bal. | 1.01 |

### Discharge performance

After discharge, specific energy of the Mg-air battery were calculated using the following equations:

$$\text{Specific energy} = \frac{\int_0^t I \times U \times \Delta t}{W_{total}} \quad (9)$$

$$W_{theo} = \frac{I \times t}{F \times \sum \left( \frac{x_i \times n_i}{m_i} \right)} \quad (10)$$

where  $W_{theo}$  (g) means the theoretical weight loss of anode,  $W_{total}$  (g) means the actual weight loss of anode before and after discharge;  $I$  (A) is applied current,  $t$  (h) is time of discharge;  $U$  (V) represents the voltage of discharge;  $F$  is Faraday constant (26.8 A h mol<sup>-1</sup>),  $x_i$ ,  $n_i$ , and  $m_i$  represent the mass fraction, number of exchanged electrons, and atomic weight, respectively, of each element in alloys.

### 308 *Full cell discharge test*

309 The discharge performance of Mg alloys in 3.5 wt.% NaCl solution was measured in a  
 310 laboratory-assembled full cell. The exposed surface area of anode was approximately  $1 \times 1$   
 311  $\text{cm}^2$ . The cathode was the commercial air cathode with  $\text{MnO}_2/\text{C}$  as catalyst ( $2 \times 2 \text{ cm}^2$ ). The  
 312 cell voltage of Mg-air battery was tested at applied current densities of 1, 2.5, 5, and  $10 \text{ mA}$   
 313  $\text{cm}^{-2}$ . During the discharge process, the electrolyte was stirred with the same rate. After the  
 314 full cell discharge test, the surface of Mg anode was cleaned by  $200 \text{ g L}^{-1} \text{ CrO}_3 + 10 \text{ g L}^{-1}$   
 315  $\text{AgNO}_3$  solution to remove the discharge products and account for the weight loss.

316

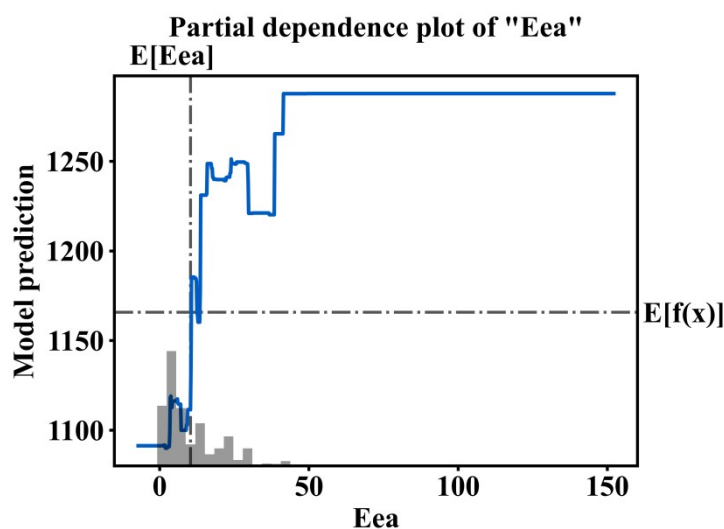

317

318 **Fig. S6.** Partial dependency plot of Eea feature.

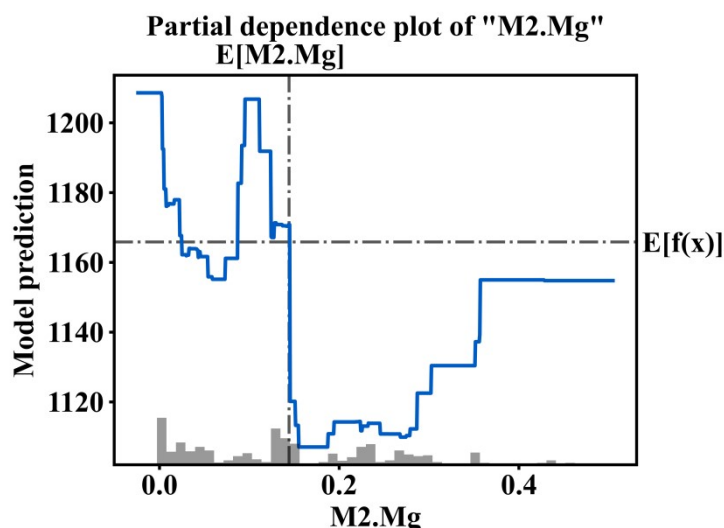

**Fig. S7.** Partial dependency plot of M2.Mg feature.

### *The availability for high-throughput screening*

The superior screening performance of the combined Eea and M2.Mg descriptors (referred to as B + F in Table 1) is evident from their ability to correctly identify 30.9% of high-performing samples (true positives) and accurately reject 91.5% of low-performing samples (true negatives). This integrated descriptor approach thus serves as an efficient screening condition for high-throughput materials discovery.

Crucially, Eea and M2.Mg are readily accessible for high-throughput screening and the prediction of novel materials. Unlike approaches relying on computationally expensive theoretical calculations (e.g., density functional theory, DFT), these descriptors are derived from direct formulaic calculations. Such calculations only require fundamental physical parameters of constituent elements, such as atomic radii and shear moduli, resulting in a minimal computational cost.

This inherent low cost makes them highly suitable for the high-throughput screening of numerous virtual materials. Specifically, our study demonstrates that when an alloy fails to satisfy the proposed criteria (i.e.,  $E_{ea} \geq 13.5$  and  $(M2.Mg \leq 0.14$  or  $M2.Mg \geq 0.3)$ ), there is a

336 91.5% probability that a magnesium-air battery utilizing it as an anode will exhibit a specific  
337 energy below 1600 mWh g<sup>-1</sup>. This high negative predictive power establishes these  
338 descriptors as potent tools for efficiently eliminating a significant portion of unqualified  
339 candidate materials.

340 While alloys satisfying these conditions exhibit a 30.9% probability of exceeding 1600  
341 mWh g<sup>-1</sup>—a moderate success rate for proactively identifying high-energy density  
342 materials—their exceptionally low computational burden nonetheless renders them ideal for  
343 preliminary screening. They effectively function as a rapid first-pass filter, substantially  
344 reducing the pool of materials that would otherwise necessitate more computationally  
345 intensive and precise theoretical calculations, thereby significantly accelerating the overall  
346 material discovery process.

347

348

349
